# Supplementary material for: Transcriptome and Peptidome Characterisation of the Main Neuropeptides and Peptidic Hormones of a Euphausiid: The Ice Krill, Euphausia crystallorophias
Source: PubMed Central journal article supplement (PMC3749230; doi:10.1371/journal.pone.0071609), 2013-08-21
Supplement: pone.0071609.s001.pdf [file pone.0071609.s001.pdf]

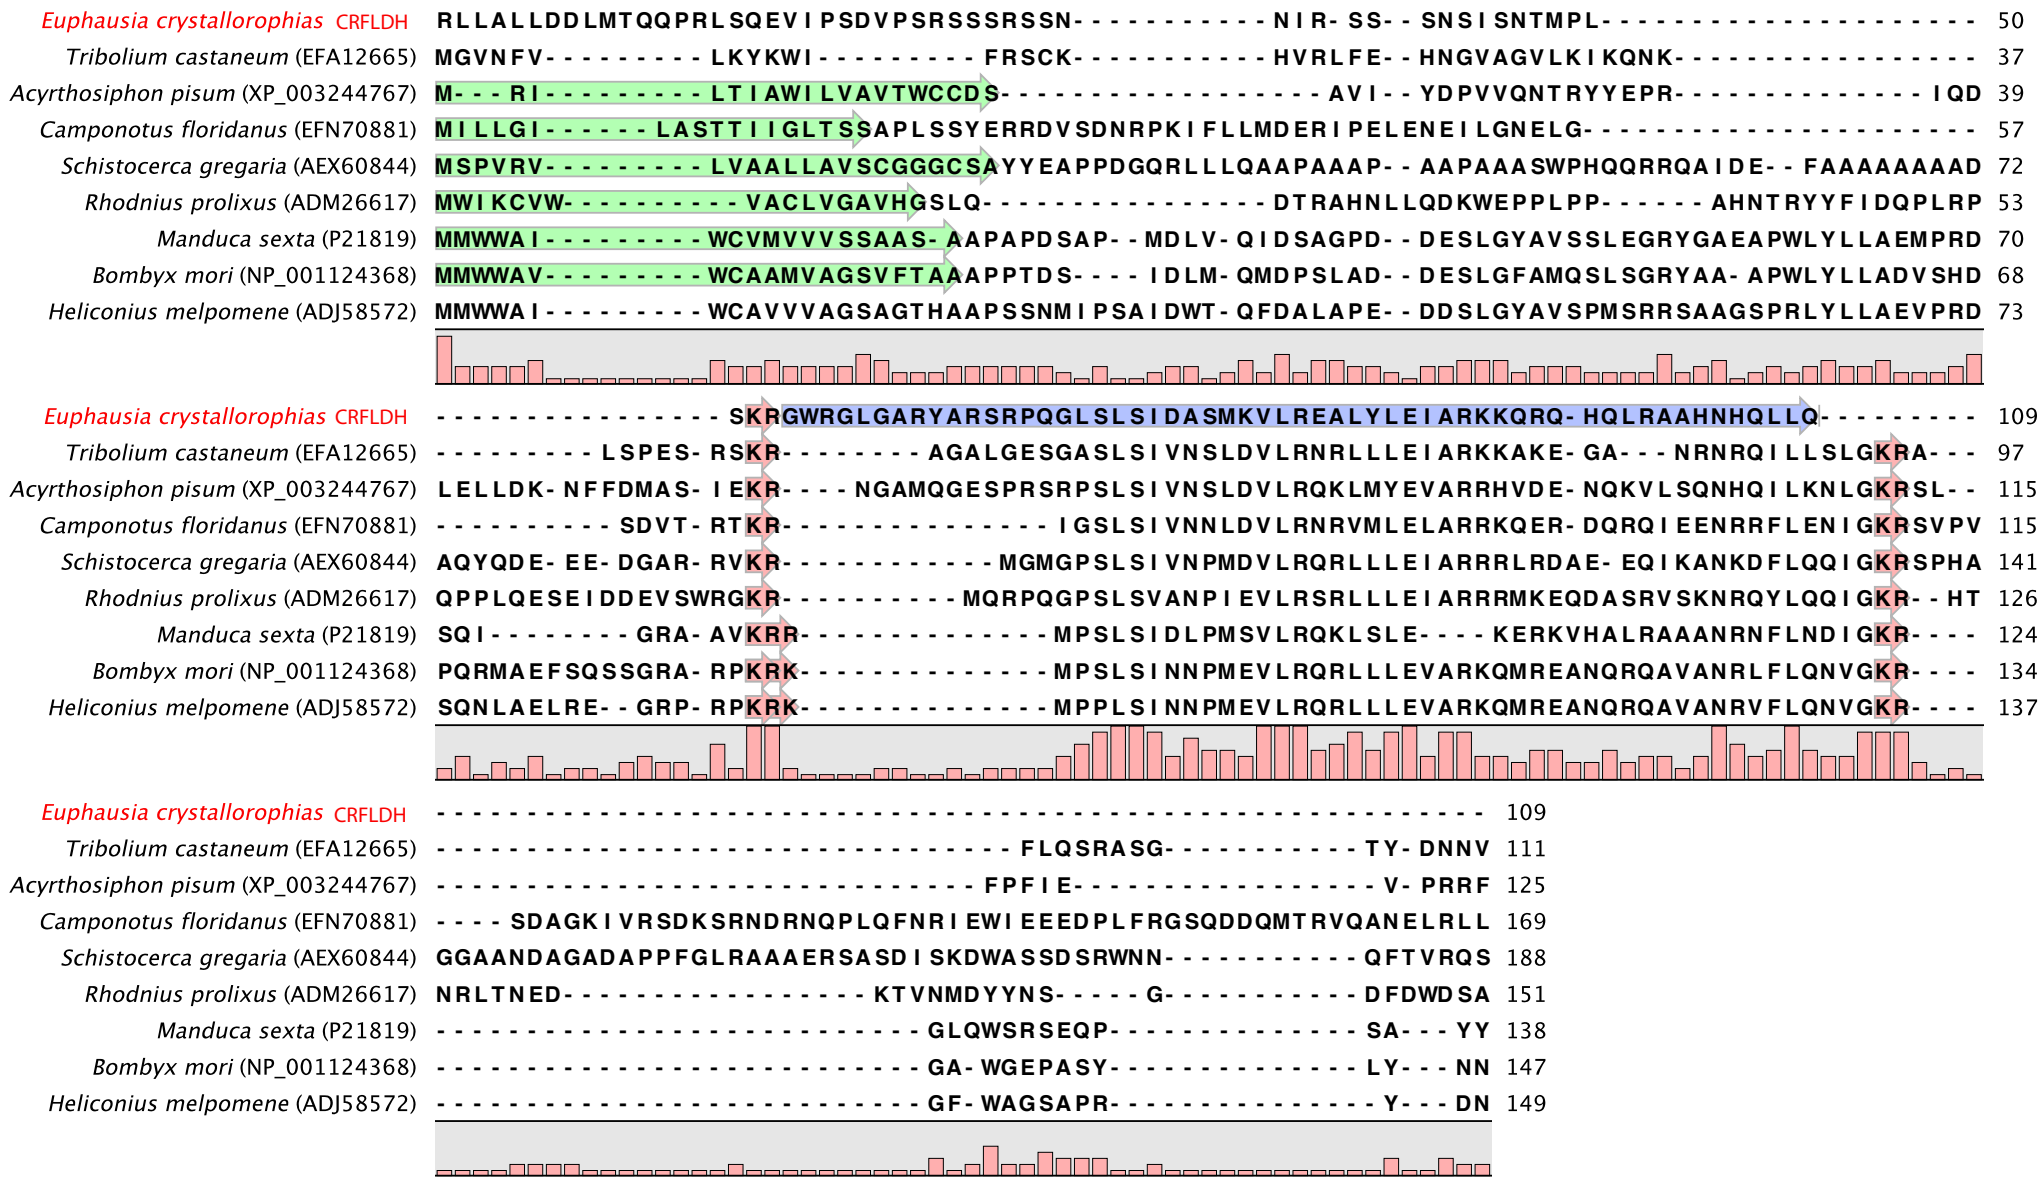

Figure S1



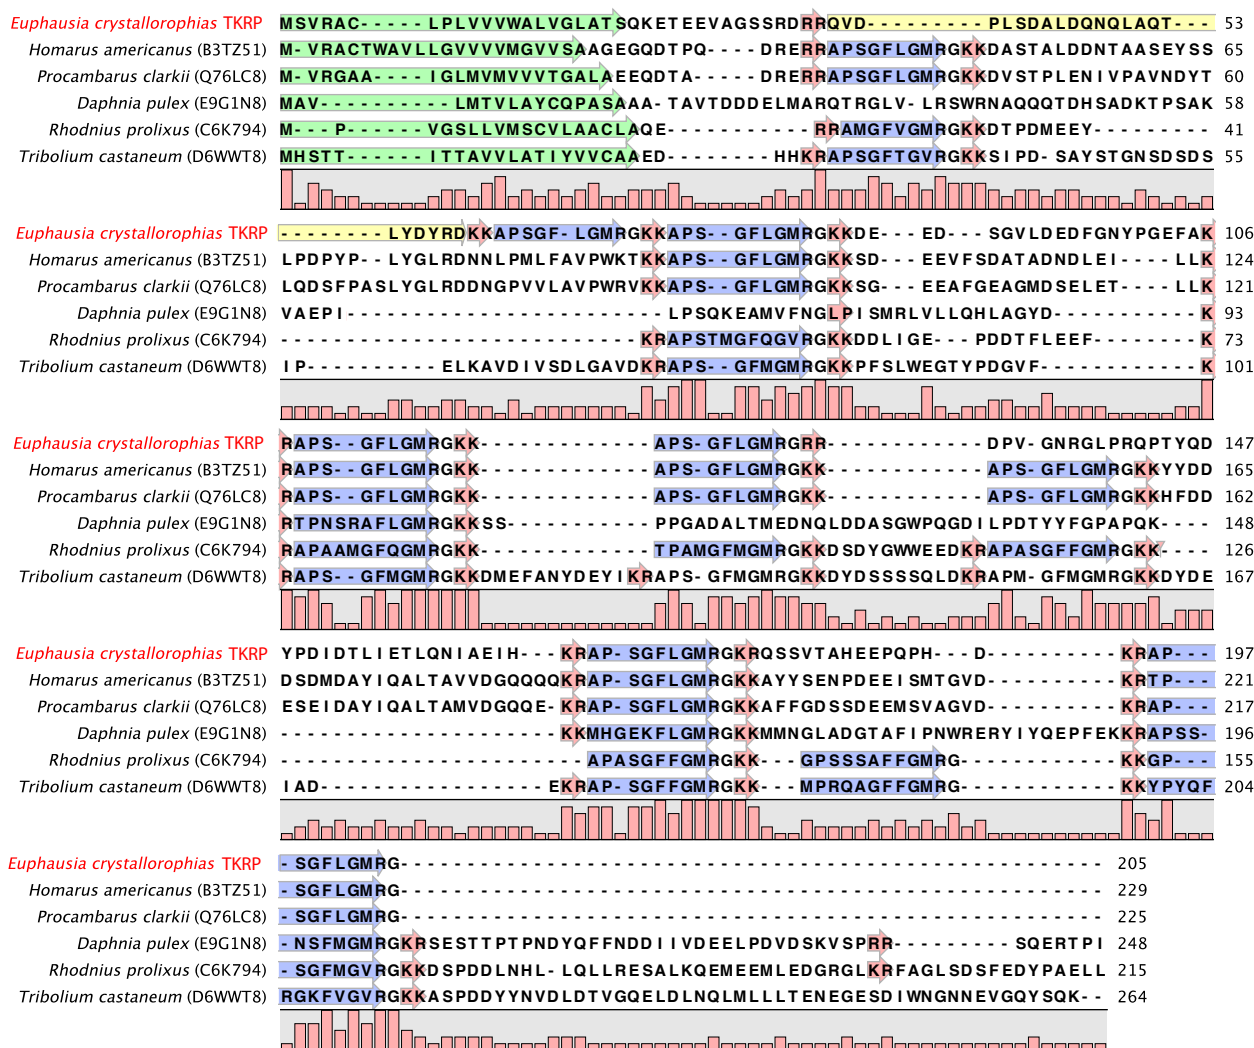

Figure S3a

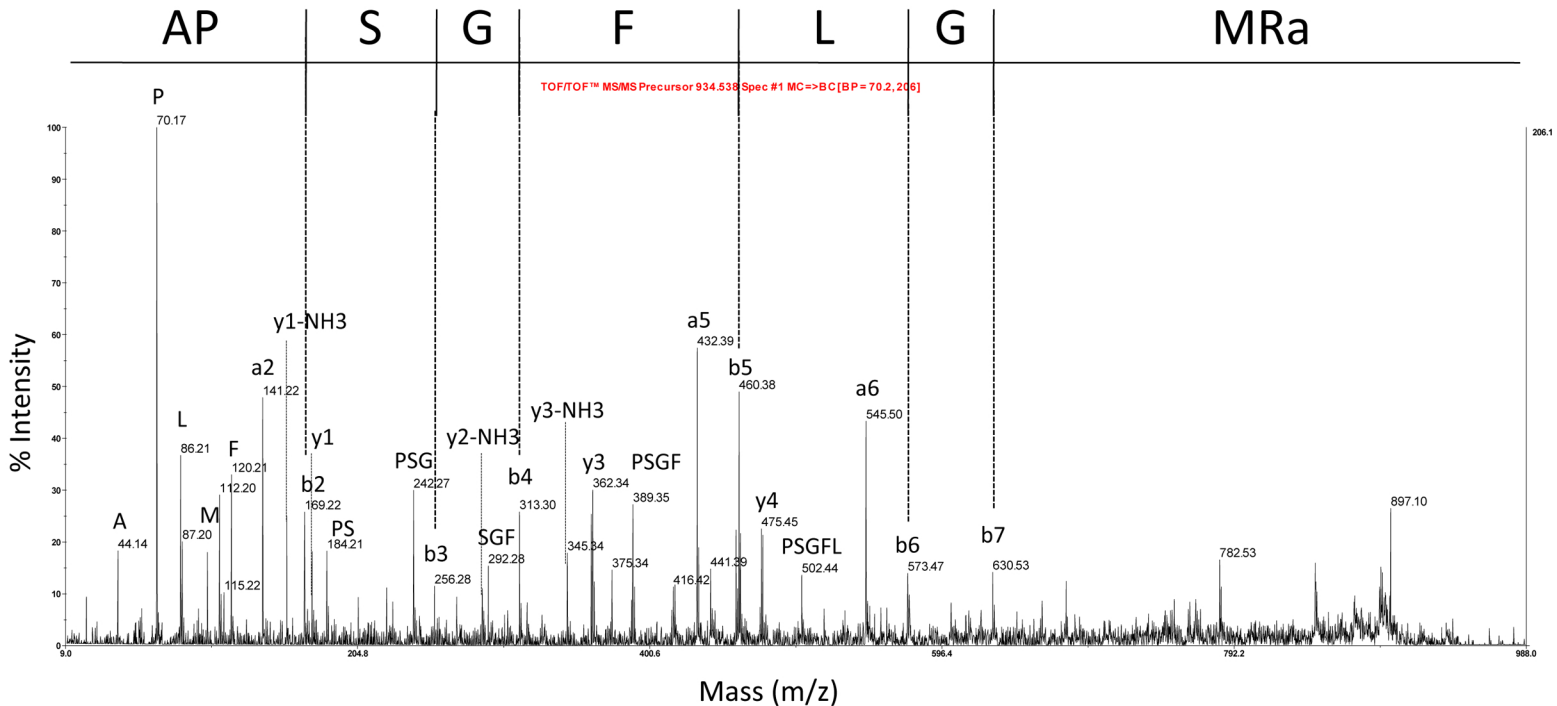

Figure S3b

APSGFLGMRa

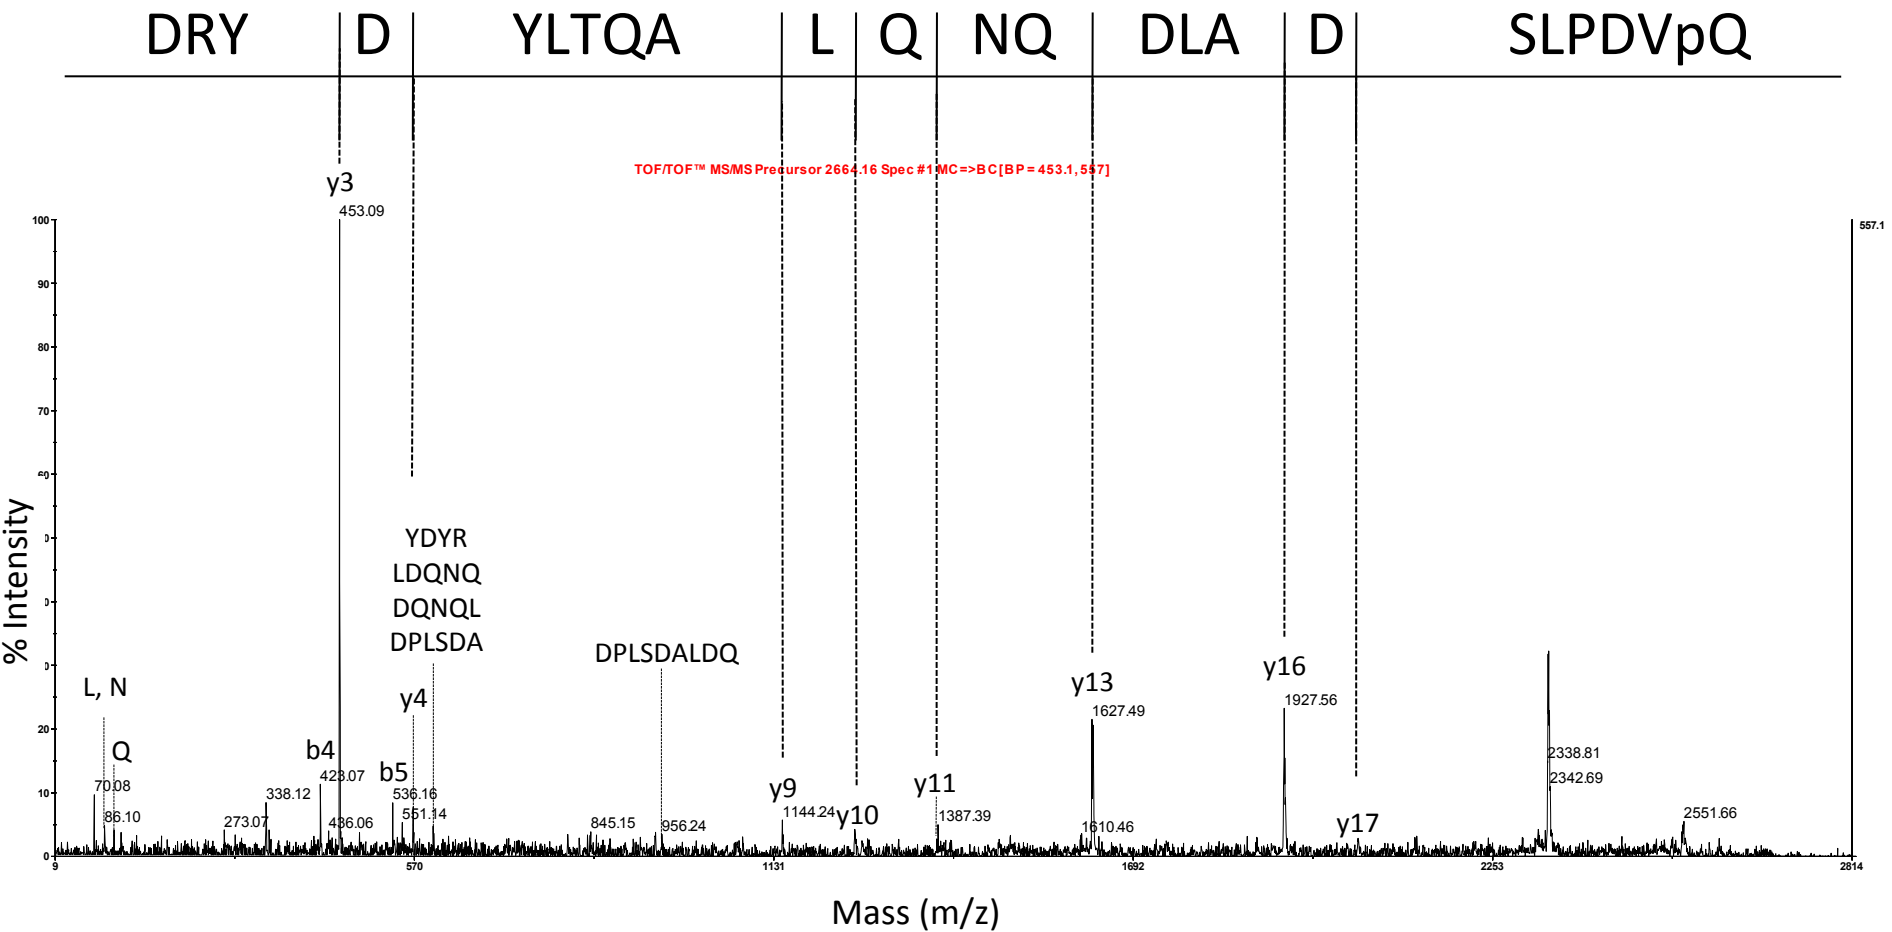

Figure S3c

pQVDPLSDALDQ NQLAQTLYDYRD

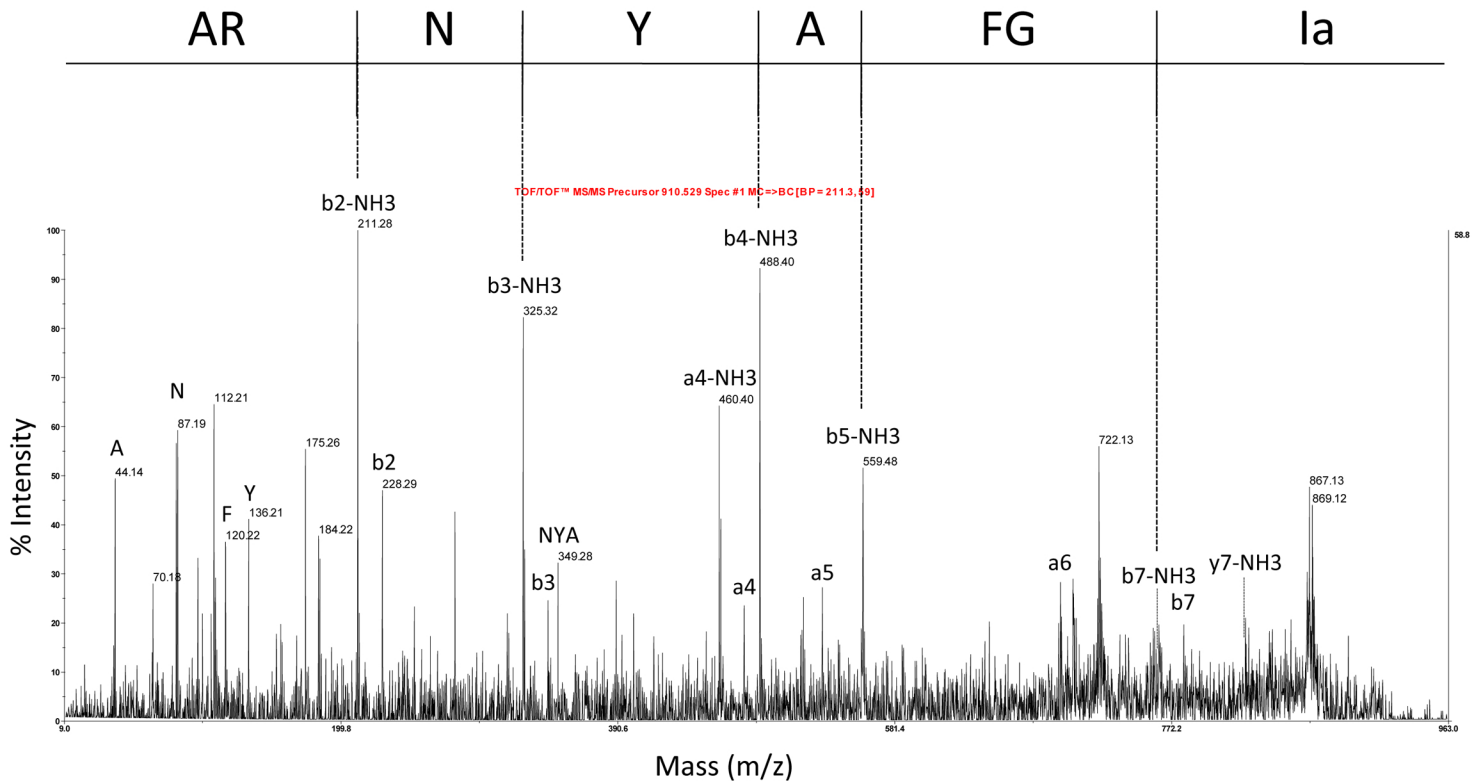

Figure S4

ARNYAFGIa



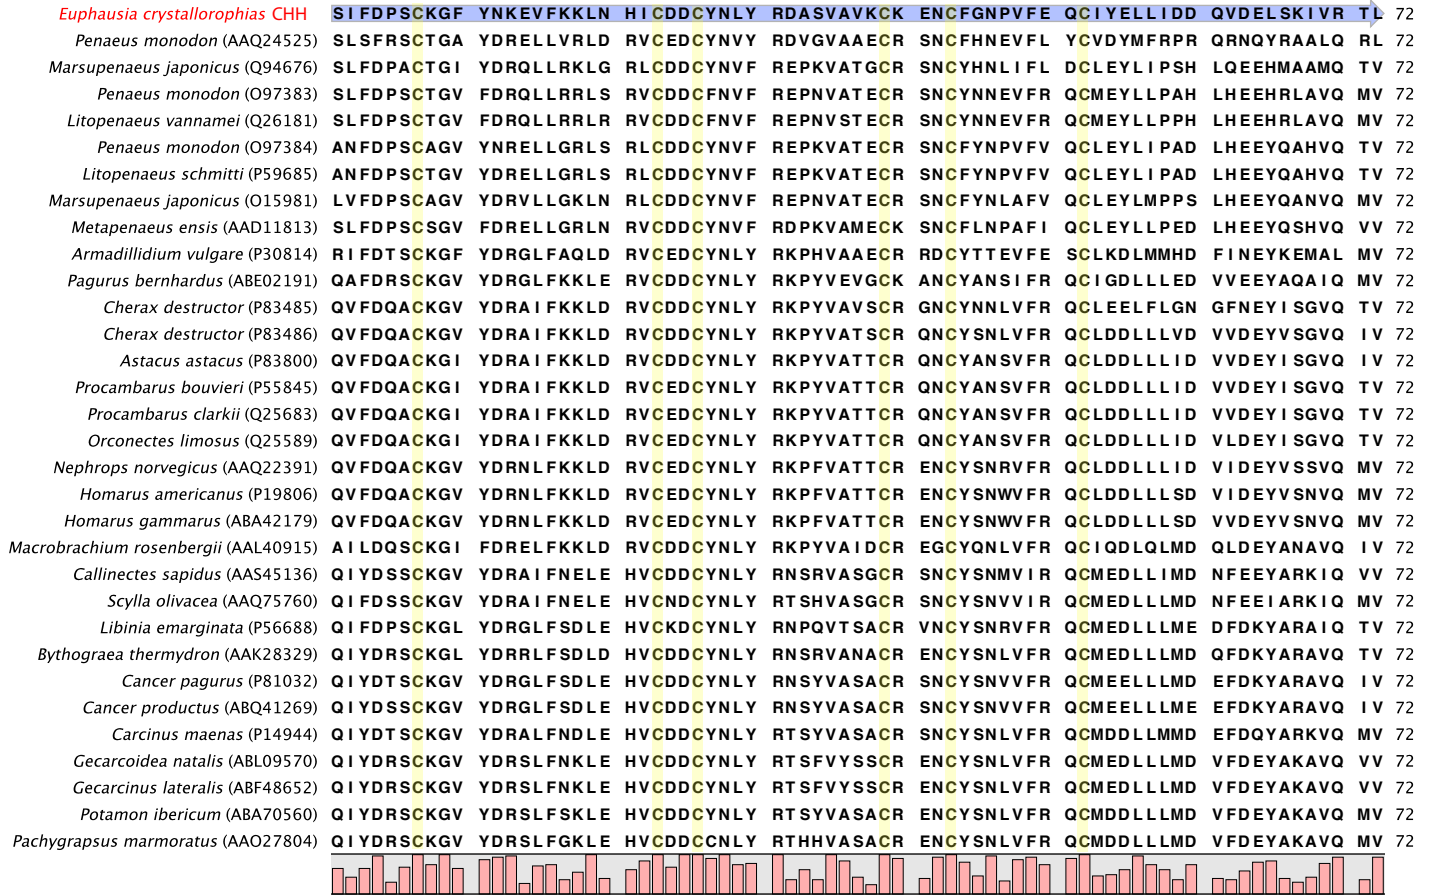

Figure S6a





|                                             |                                                                                                 |    |
|---------------------------------------------|-------------------------------------------------------------------------------------------------|----|
| <i>Euphausia crystallorophias</i> MIH/VIH1  | NVAHLSSCGSLAGQRH IHRQVEQI CLD CDNLYRQSRAGYNCRQSCYANPHFELCVHDL LLLSHRVMFRLL I SMLQASL - -        | 78 |
| <i>Euphausia crystallorophias</i> MIH/VIH2  | - - - - - CGS I FGQRH I ALKVEQV CRD CENLSRNYQTAFNCRKDCYTSETYTKCL - - - - -                      | 48 |
| <i>Metapenaeus ensis</i> (AAL33882)         | FSID- YTC TGAMGNRD IYKQVSRV CDDCAN IYRLPGLDGMCRNRCFNNFWFM I CLRAAKREDEIDKFRVW I S I LNP GGAW    | 79 |
| <i>Metapenaeus ensis</i> (O76534)           | SYIE- NTCRGVMGNRD IYKKVVRV CEDCTN I FRLPGLDGMCRDRCFNNEWFLV CLKAANRDELDKFKVW I S I LNPGL - -     | 77 |
| <i>Fenneropenaeus chinensis</i> (AAL55258)  | SFID- GTCRGVMGNRD IYKKVVRV CEDCTN I FRLPGLDGMCRDRCFYNEWFL I CLKAANREDEIENFRVW I S I LNA - - -   | 75 |
| <i>Penaeus monodon</i> (AAR89516)           | SFID- GTCRGVMGNRD IYKKVVRV CEDCTN I FRLPGLDGMCRDRCFYNEWFL I CLKAANREDEI EKFKVW I S I LNAGQ - -  | 77 |
| <i>Marsupenaeus japonicus</i> (P55847)      | SFID- NTCRGVMGNRD IYKKVVRV CEDCTN I FRLPGLDGMCRNRCFYNEWFL I CLKAANREDEI EKFRVW I S I LNAGQ - -  | 77 |
| <i>Penaeus monodon</i> (AAR89517)           | SLMD- GTCRGRMGNRE IYKQVDRV CEDCVN I FRLPGLEGLCRDRCFYNEWFL CLKAANREDEIENFRVW I S I LNA - - -     | 75 |
| <i>Penaeus monodon</i> (BAB69829)           | SLTD- GTCRGRMGNRE IYKQVDRV CEDCAN I FRLPGLEGLCRDRCFYNEWFL CLKAANREDEIENFRVW I S I LNA - - -     | 75 |
| <i>Penaeus monodon</i> (BAB69830)           | SLTE- GTCRGRMGNRE IYKQVDRV CEDCAN I FRLPGLEGLCRDRCFYNEWFL CLKAANREDEIENFRVW I S I LNA - - -     | 75 |
| <i>Marsupenaeus japonicus</i> (BAE78494)    | SILD- SNCRGAMGNRD IYTKVERV CEDCTNLYRLPQLDGLCRNRCFNNQWFLL CLKATERQDELENFRLW I S I LNAGRAW        | 79 |
| <i>Orconectes limosus</i> (P83636)          | RYVF- EEC PGVMGNRALHGKVTRV CEDCYNVFRD TDV LAGCRKGCFSSEMFKL LLAMERVEEFPDFKRW I G I LNA - - -     | 75 |
| <i>Procambarus clarkii</i> (P55848)         | RYVF- EEC PGVMGNRAVHGKVTRV CEDCYNVFRD TDV LAGCRKGCFSSEMFKL LLAMERVEEFPDFKRW I G I LNA - - -     | 75 |
| <i>Scylla serrata</i> (AAL99355)            | RVIN- DD CPNL I GNRDLYKKVEW I CDDCAN IYRITGMASL CRKDCFFNEDFLWCVSA I ERSEEMTQLKQWV M I LGA - - - | 75 |
| <i>Callinectes sapidus</i> (P55321)         | RVIN- DD CPNL I GNRDLYKKVEW I CDDCAN IYRSTGMASL CRKDCFFNEDFLWCVRATERSEDLAQLKQWV T I LGAGRI -    | 78 |
| <i>Portunus pelagicus</i> (ABM74397)        | RVIN- DD CPNLMGNRDLYKKVEW I CDDCAN IYRITGMASL CRKDCFFNEDFLWCVRATERSEDMTQLKQWV R I LGAGRI -      | 78 |
| <i>Charybdis feriatus</i> (O96605)          | RVFN- DD CPNLMGNRDLYKKVEW I CDDCAN IFRIPGMAS I CRKDCFFNEDFLWCVRATERTEEMMLKQWV R I LGAGRM -      | 78 |
| <i>Cancer magister</i> (O61389)             | RVIN- DD CPNL I GNRDLYKRVEW I CEDCSN IFRNTGMAT LCRKNCFFNEDFLWCVYATERTEEMSQLRQWV G I LGAGRE -    | 78 |
| <i>Cancer pagurus</i> (CAC05346)            | RVIN- DD CPNL I GNRDLYKKVEW I CEDCSN IFRNTGMAT LCRKNCFFNEDFLWCVYATERTEEMSQLRQWV G I LGAGRE -    | 78 |
| <i>Carcinus maenas</i> (Q27225)             | RVIN- DEC PNLI GNRDLYKKVEW I CEDCSN IFRKTGMASL CRRNCFNEDFVWCVHATERSEELRDLEEWV G I LGAGRD -      | 78 |
| <i>Gecarcinus lateralis</i> (ABF06632)      | AVIN- DEC PNVI GNRD I FKKVDWI CEDCAN IFRIDGLAT LCRKNCFRNIDFLWCVYASERQA EKDELTRYV S I LRAGSV -   | 78 |
| <i>Eriocheir sinensis</i> (AAQ81640)        | G I IN- AEC PNM I GNRD IYKKVDWI CEDCAN IFRIDGLGML CRKNCFRNIDFLWCVYASERHAQKDDLTRYV S I LGQ - - - | 75 |
| <i>Homarus americanus</i> (P55320)          | WFTN- DEC PGVMGNRDLYEKVAWV CND CAN IFRNNDVGVMCKKDCFHTMDFLWCVYATERHGEIDQFRKWV S I LRA - - -      | 75 |
| <i>Homarus gammarus</i> (ABA42181)          | WFTN- DEC PGVMGNRDLYEKVAWV CND CAN IFRNNDVGVMCKKDCFHTMDFLWCVYATERHGEIDQFRKWV S I LRA - - -      | 75 |
| <i>Nephrops norvegicus</i> (AAK58133)       | WFTN- DEC PGVMGNRDLYEKVAWV CND CAN IFRINDVGVKCKKDCFHNMDFLWCVYATERHGEIDQFRKW I S I LRA - - -     | 75 |
| <i>Macrobrachium rosenbergii</i> (AAL37948) | RYLD- DEC PGVMGNRDLYEKVVRV CDDCSN IFRMNDMGT RCRKDCFYNVDFLWCVYATERHGDVDQLNRWMS I LRA - - -       | 75 |
| <i>Macrobrachium rosenbergii</i> (AAL37949) | RFLD- DEC RGV MGNRDLYEYVVR I CDDCENLFRKSNVGSRCCKKCFYNEDFMWCVRATERDELEHLNRAMS I I RV - - -       | 75 |
| <i>Armadillidium vulgare</i> (P83627)       | RRDM- PGC LGVLGNRDLYDDVSRI CSDCQNVFRDKNVESKCRSDCFSTSYFETC I MALDLAEKI SDYKLHAS I LKE - - -      | 75 |

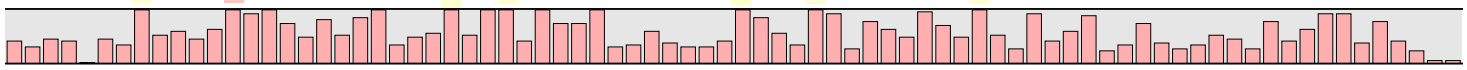

Figure S7

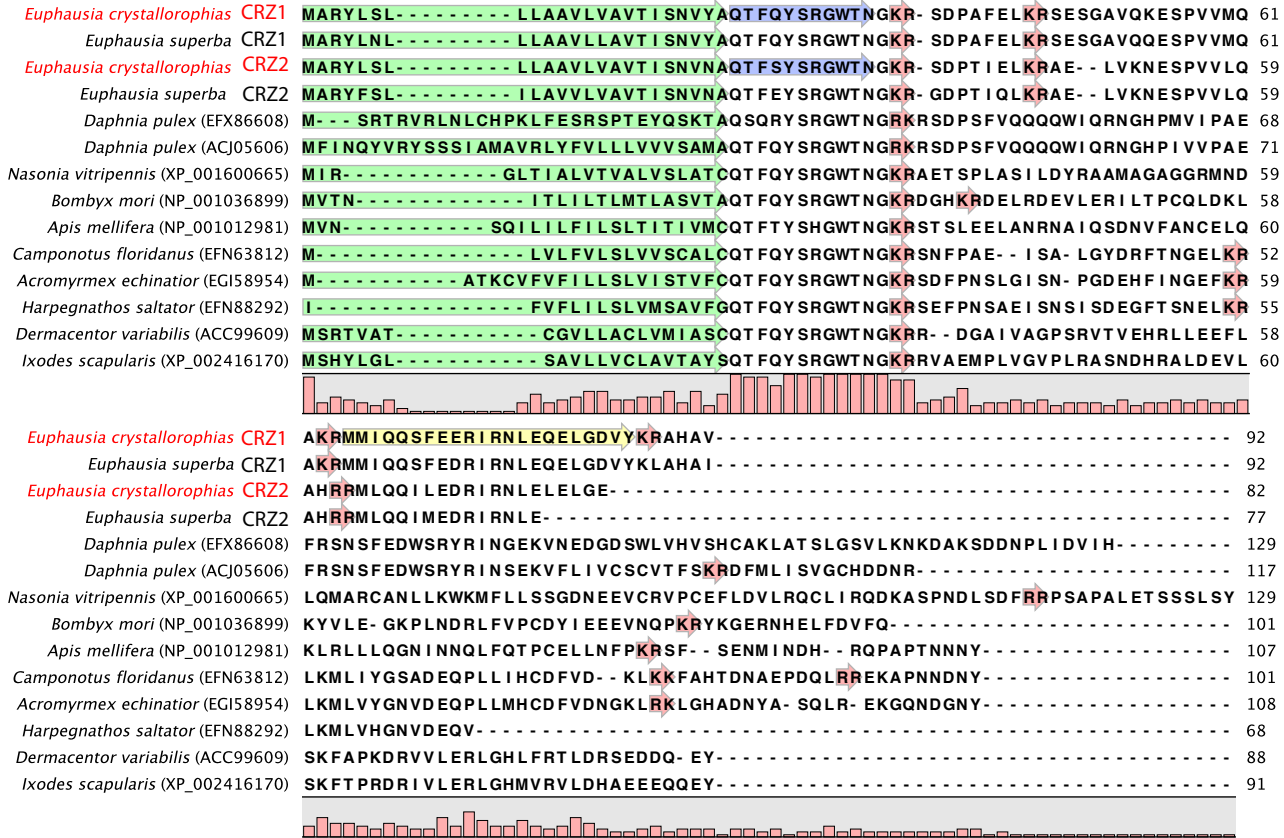

Figure S8a



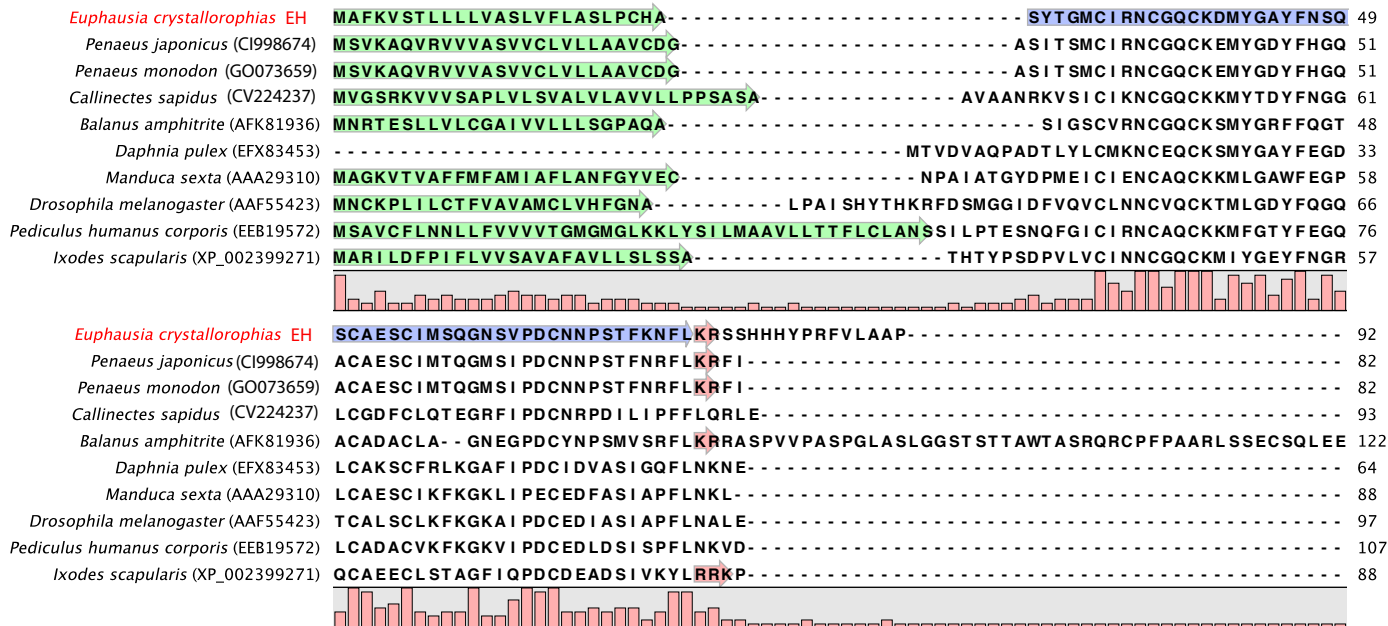

Figure S9



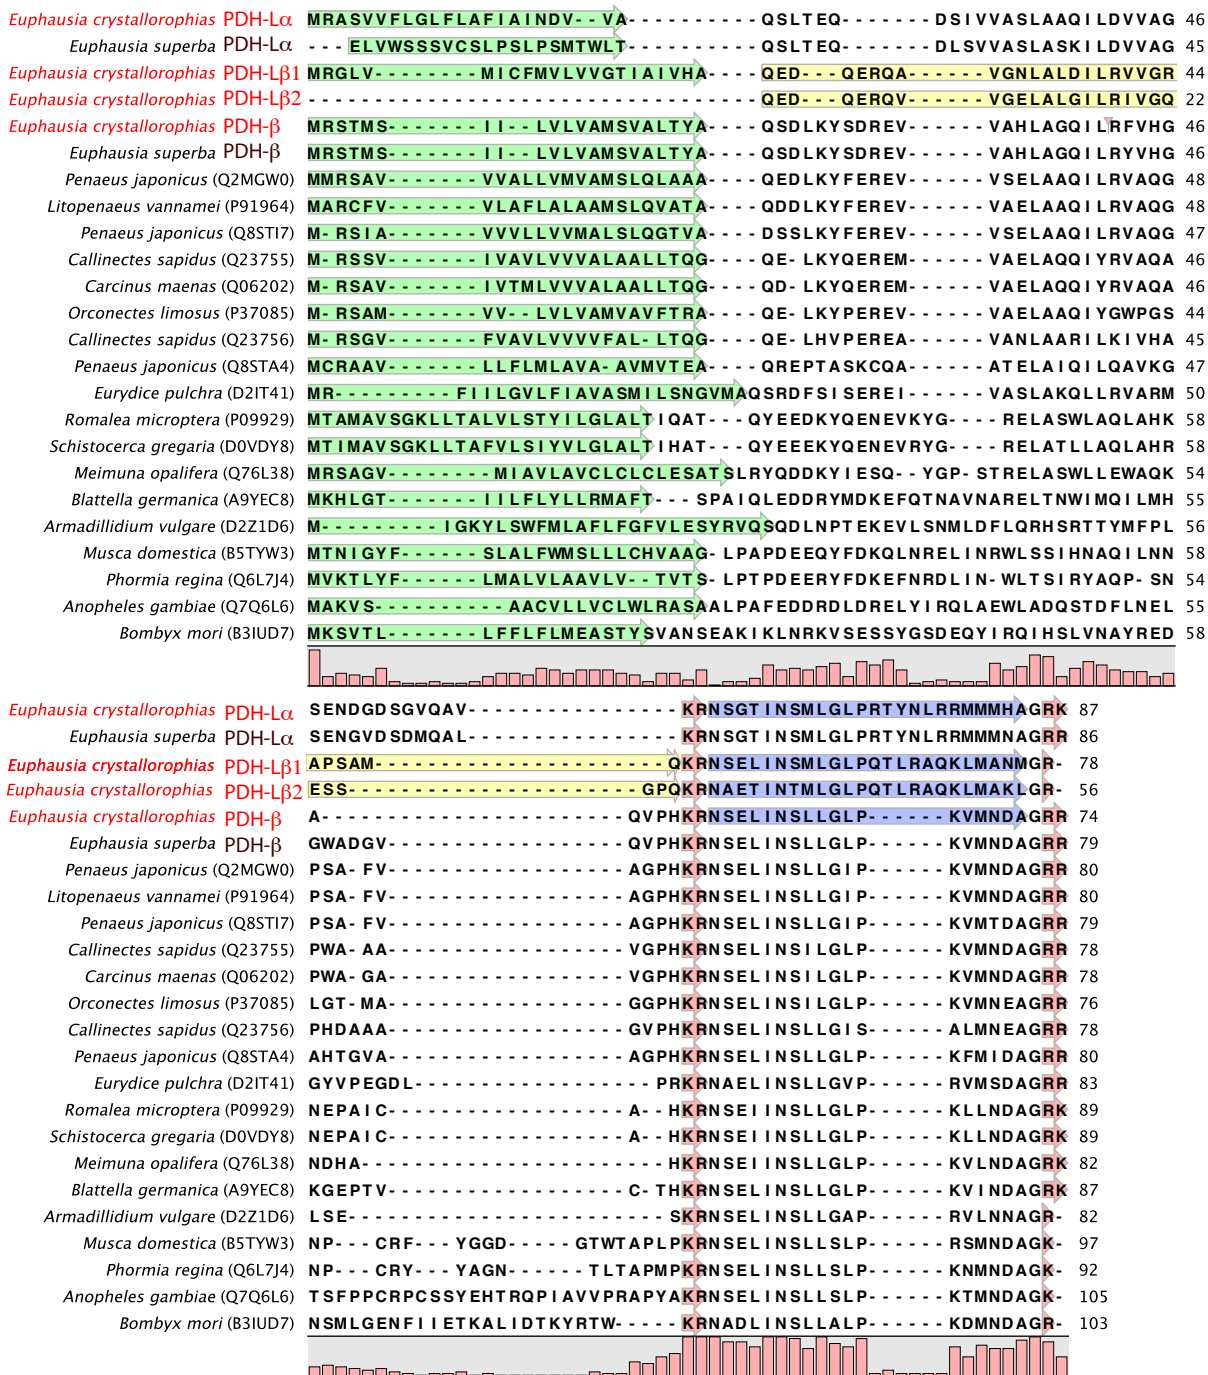

Figure S11a





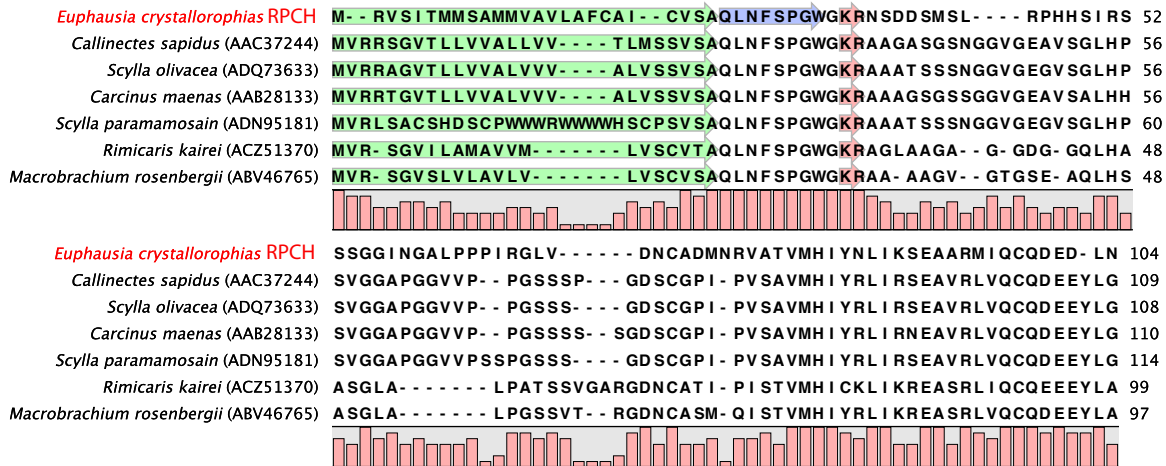

Figure S12a

|                                                          |             |    |
|----------------------------------------------------------|-------------|----|
| <i>Helicoverpa zea</i> (P67787; P08901)                  | QLTFTSSWG-  | 9  |
| <i>Manduca sexta</i> (P67788; P08901)                    | QLTFTSSWG-  | 9  |
| <i>Drosophila melanogaster</i> (P61855; P17975; Q9VZH6)  | QLTFSPDWG-  | 9  |
| <i>Protophormia terraenovae</i> (P61856; P17975; Q9VZH6) | QLTFSPDW-   | 8  |
| <i>Tabanus atratus</i> (P14595)                          | QLTFTPGW-   | 8  |
| <i>Libellula auripennis</i> (P25418)                     | QVNFTPSW-   | 8  |
| <i>Locusta migratoria</i> (P19872)                       | QLNFTPWWG-  | 9  |
| <i>Locusta migratoria</i> (P55319; P01271; P10616)       | QLNFTPNWGT  | 10 |
| <i>Schistocerca gregaria</i> (P18829)                    | QLNFTPNWGT  | 10 |
| <i>Anoplotrupes stercorosus</i> (P84241; P25423)         | QLNYSPDW-   | 8  |
| <i>Pachnoda marginata</i> (P84242; P25423)               | QLNYSPDW-   | 8  |
| <i>Melolontha melolontha</i> (P84240; P25423)            | QLNYSPDW-   | 8  |
| <i>Metacarcinus magister</i> (1812292A)                  | ELNFSPGW-   | 8  |
| <i>Euphausia crystallorophias</i> RPCH                   | QLNFSPGW-   | 8  |
| <i>Carcinus maenas</i> (Q26324)                          | QLNFSPGW-   | 8  |
| <i>Callinectes sapidus</i> (AAC37244)                    | QLNFSPGW-   | 8  |
| <i>Scylla paramamosain</i> (ADN95181)                    | QLNFSPGW-   | 8  |
| <i>Scylla olivacea</i> (ADQ73633)                        | QLNFSPGW-   | 8  |
| <i>Macrobrachium rosenbergii</i> (ABV46765)              | QLNFSPGW-   | 8  |
| <i>Rimicaris kairei</i> (ACZ51370)                       | QLNFSPGW-   | 8  |
| <i>Pandalus borealis</i> (P08939)                        | QLNFSPGW-   | 8  |
| <i>Blatta orientalis</i> (P84261; P04548)                | QVNFSPNW-   | 8  |
| <i>Periplaneta americana</i> (P84259; P04548)            | QVNFSPNW-   | 8  |
| <i>Deropeltis integerrima</i> (P85591)                   | QVNFSPNW-   | 8  |
| <i>Eurycotis floridana</i> (P85634)                      | QVNFSPNW-   | 8  |
| <i>Blatta lateralis</i> (P85855)                         | QVNFSPNW-   | 8  |
| <i>Deropeltis atra</i> (P85597)                          | QVNFSPNW-   | 8  |
| <i>Deropeltis erythrocephala</i> (P85585)                | QVNFSPNW-   | 8  |
| <i>Cryptocercus darwini</i> (P85570)                     | QLNFSPNW-   | 8  |
| <i>Cryptocercus kyebangensis</i> (P85575)                | QLNFSPNW-   | 8  |
| <i>Ergaula capucina</i> (P85612)                         | QLNFSPNW-   | 8  |
| <i>Locusta migratoria</i> (P08379; P10617)               | QLNF SAGWG- | 9  |
| <i>Schistocerca gregaria</i> (P35808; P08378)            | QLNFSTGWG-  | 9  |
| <i>Schistocerca nitens</i> (P35807; P08378)              | QLNFSTGWG-  | 9  |
| <i>Daphnia pulex</i> (EFX68649)                          | QVNFSTSWG-  | 9  |
| <i>Romalea microptera</i> (P67786; P14086)               | QVNFSTGW-   | 8  |
| <i>Gryllus bimaculatus</i> (P67785; P14086)              | QVNFSTGW-   | 8  |
| <i>Archimandrita tessellata</i> (P85538)                 | QVNFSPGWGT  | 10 |
| <i>Aptera fusca</i> (P85533)                             | QVNFSPGWGT  | 10 |
| <i>Bantua robusta</i> (P85543)                           | QVNFSPGWGT  | 10 |
| <i>Blaptica dubia</i> (P85549)                           | QVNFSPGWGT  | 10 |
| <i>Loboptera decipiens</i> (P85846)                      | QVNFSPGWGT  | 10 |
| <i>Lucihormetica grossei</i> (P85664)                    | QVNFSPGWGT  | 10 |
| <i>Blaberus craniifer</i> (P85546)                       | QVNFSPGWGT  | 10 |
| <i>Blattella germanica</i> (P84220; P10939)              | QVNFSPGWGT  | 10 |
| <i>Blaberus giganteus</i> (P85557)                       | QVNFSPGWGT  | 10 |
| <i>Blepharodera discoidalis</i> (P85565)                 | QVNFSPGWGT  | 10 |
| <i>Diploptera punctata</i> (P85602)                      | QVNFSPGWGT  | 10 |
| <i>Elliptorhina</i> sp. (P85851)                         | QVNFSPGWGT  | 10 |
| <i>Eublaberus distanti</i> (P85618)                      | QVNFSPGWGT  | 10 |
| <i>Eublaberus posticus</i> (P85624)                      | QVNFSPGWGT  | 10 |
| <i>Gromphadorina portentosa</i> (P84221; P10939)         | QVNFSPGWGT  | 10 |
| <i>Gyna lurida</i> (P85651)                              | QVNFSPGWGT  | 10 |
| <i>Gromphadorhina grandidieri</i> (P85639)               | QVNFSPGWGT  | 10 |

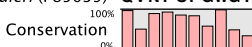

Figure S12b

|                                           |              |                          |    |
|-------------------------------------------|--------------|--------------------------|----|
| <i>Euphausia crystallorophias</i> ASTC    | - - - -      | <b>SYWKQCAFNAVSCF</b>    | 14 |
| <i>Euphausia superba</i> ASTC             | - - - -      | <b>SYWKQCAFNA- - - -</b> | 10 |
| <i>Homarus americanus</i> (EY291152)      | - - - -      | <b>SYWKQCAFNAVSCF</b>    | 14 |
| <i>Daphnia pulex</i> (EFX85706)           | - - - -      | <b>SYWKQCAFNAVSCF</b>    | 14 |
| <i>Laupala kohalensis</i>                 | - - - -      | <b>SYWKQCAFNAVSCF</b>    | 14 |
| <i>Locusta migratoria</i> (CO820847)      | - - - -      | <b>SYWKQCAFNAVSCF</b>    | 14 |
| <i>Daphnia pulex</i>                      | <b>GQSSQ</b> | <b>RVFWRCYFNAVSCF</b>    | 19 |
| <i>Litopenaeus vannamei</i> (FE182974)    | - - - -      | <b>QIRYHQCYFNPI SCF</b>  | 15 |
| <i>Cancer borealis</i>                    | - - - -      | <b>QIRYHQCYFNPI SCF</b>  | 15 |
| <i>Drosophila melanogaster</i> (AAK40081) | - - - -      | <b>QVRFRQCYFNPI SCF</b>  | 15 |
| <i>Tribolium castaneum</i> (EFA09152)     | - - - -      | <b>QSRFRQCYFNPI SCF</b>  | 15 |
| <i>Bombyx mori</i> (BAG68396)             | - - - -      | <b>QVRFRQCYFNPI SCF</b>  | 15 |
| <i>Spodoptera frugiperda</i> (CAD32496)   | - - - -      | <b>QVRFRQCYFNPI SCF</b>  | 15 |
| <i>Samia cynthia ricini</i> (AAY68369)    | - - - -      | <b>QVRFRQCYFNPI SCF</b>  | 15 |
| <i>Manduca sexta</i> (P42559)             | - - - -      | <b>QVRFRQCYFNPI SCF</b>  | 15 |

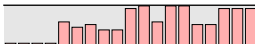

Figure S13



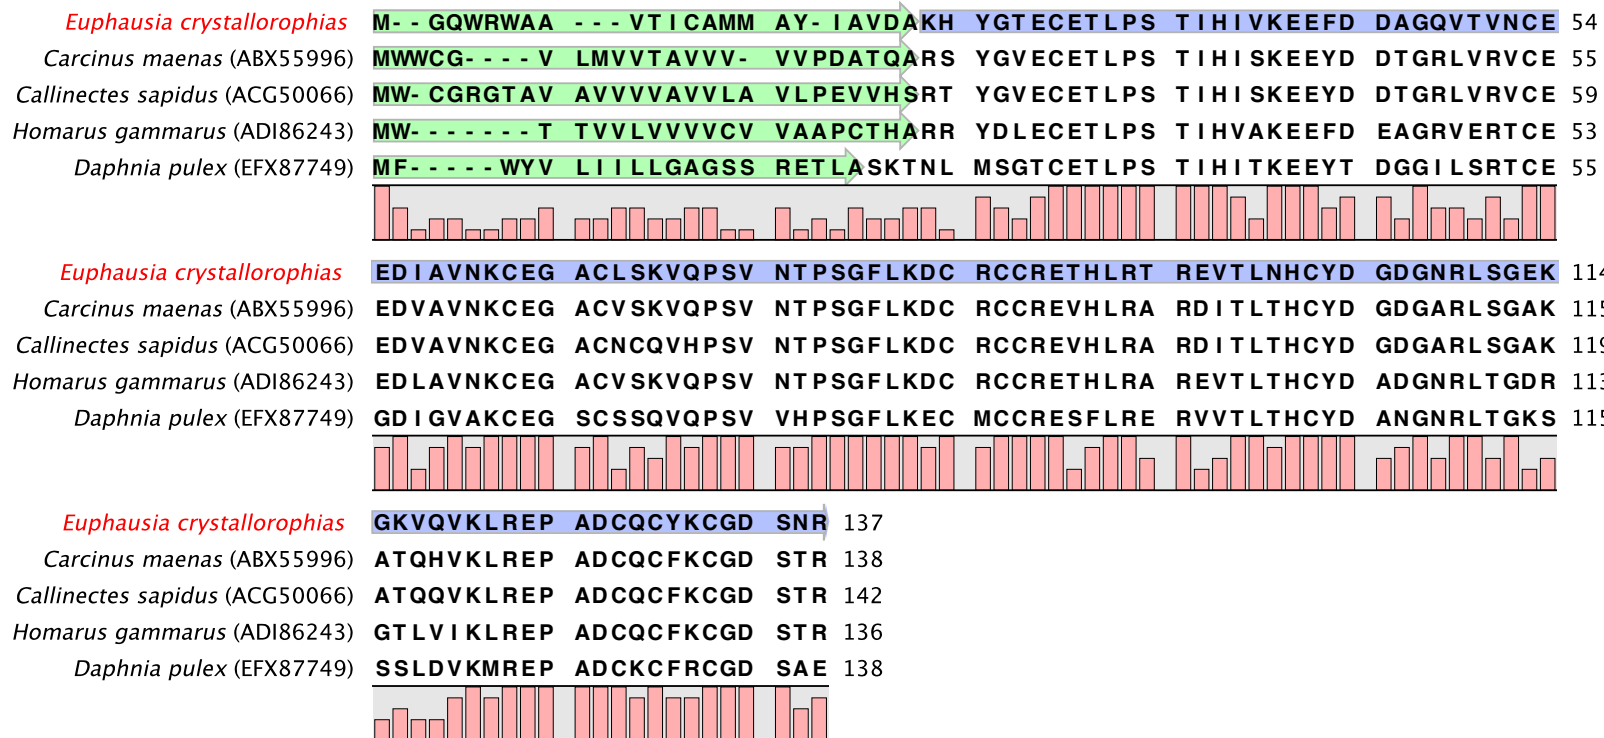

Figure S14b



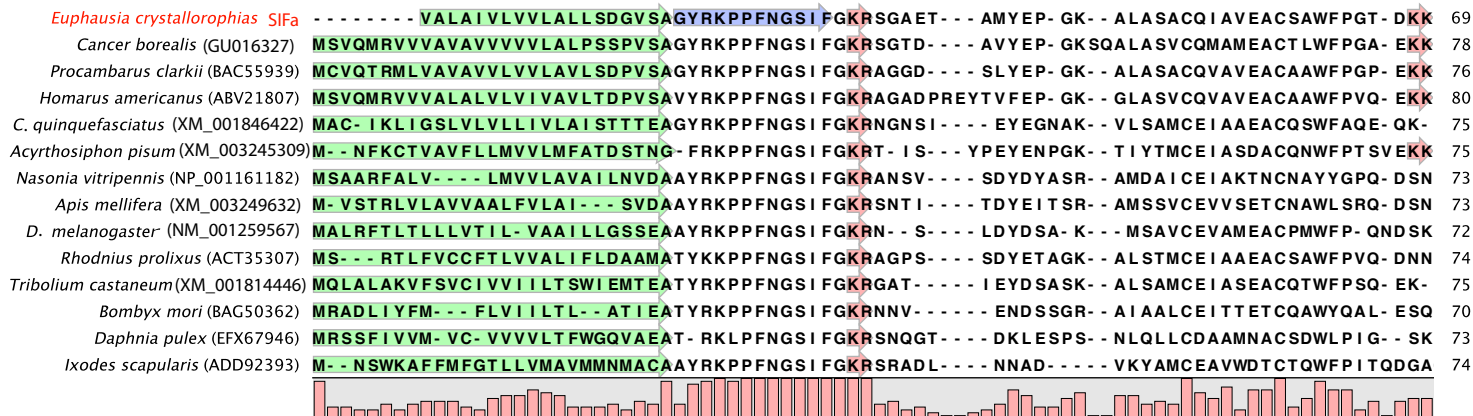

Figure S16
